# Supplementary material for: Clinical activity of fulvestrant in metastatic breast cancer previously treated with endocrine therapy and/or chemotherapy
Source: PubMed Central journal article supplement — Korean J Intern Med. 2018 Mar 16;34(5):1100–6. doi: 10.3904/kjim.2017.226 (PMC6718770; doi:10.3904/kjim.2017.226), 2018-03-16
Supplement: kjim-2017-226-suppl1.pdf [file kjim-2017-226-suppl1.pdf]

**Supplementary Table 1. The prognostic factors that affected patients survival the development of metastasis in univariate survival analysis**

| Characteristic                                             | Progression-free survival |         | Overall survival      |         |
|------------------------------------------------------------|---------------------------|---------|-----------------------|---------|
|                                                            | Hazard ratio (95% CI)     | p value | Hazard ratio (95% CI) | p value |
| Age <sup>a</sup> (≥ 57 year)                               | 1.065 (0.680–1.670)       | 0.782   | 1.242 (0.666–2.315)   | 0.495   |
| Time to recurrence from surgery (< 5 years)                | 1.049 (0.639–1.723)       | 0.850   | 1.131 (0.575–2.228)   | 0.721   |
| Time to fulvestrant from 1st endocrine therapy (< 5 years) | 1.052 (0.613–1.806)       | 0.855   | 1.267 (0.654–2.455)   | 0.483   |
| Stage at diagnosis (stage IV)                              | 1.453 (0.830–2.541)       | 0.191   | 2.387 (1.065–5.351)   | 0.035   |
| Adjuvant endocrine therapy (received)                      | 0.990 (0.625–1.569)       | 0.966   | 0.599 (0.321–1.117)   | 0.107   |
| Chemotherapy (≥ 2 regimen)                                 | 1.464 (0.914–2.346)       | 0.113   | 2.254 (1.208–4.207)   | 0.011   |
| Visceral metastasis (present)                              | 1.152 (0.732–1.813)       | 0.540   | 1.498 (0.793–2.832)   | 0.213   |

CI, confidence interval.

<sup>a</sup>Age at time of fulvestrant therapy.
