# Supplementary material for: Clinical activity of fulvestrant in metastatic breast cancer previously treated with endocrine therapy and/or chemotherapy
Source: PubMed Central journal article supplement — Korean J Intern Med. 2018 Mar 16;34(5):1100–6. doi: 10.3904/kjim.2017.226 (PMC6718770; doi:10.3904/kjim.2017.226), 2018-03-16
Supplement: kjim-2017-226-suppl2.pdf [file kjim-2017-226-suppl2.pdf]

**Supplementary Table 2. Multivariate analysis of associations for clinical features with overall survival**

| Characteristic                        | Overall survival      |         |
|---------------------------------------|-----------------------|---------|
|                                       | Hazard ratio (95% CI) | p value |
| Stage at diagnosis (stage IV)         | 1.848 (0.705–4.843)   | 0.212   |
| Adjuvant endocrine therapy (received) | 0.889 (0.412–1.918)   | 0.765   |
| Chemotherapy ( $\geq 2$ regimen)      | 2.017 (0.967–3.712)   | 0.071   |
| Visceral metastasis (present)         | 1.413 (0.736–2.715)   | 0.299   |

CI, confidence interval.
